# Supplementary material for: Rock glaciers in Daxue Shan, south-eastern Tibetan Plateau: an inventory, their distribution, and their environmental controls
Source: Copernicus journal article supplement (doi:10.5194/tc-12-2327-2018), 2018-07-16
Supplement: Supplementary file 1 [file tc-12-2327-2018-supplement.zip]

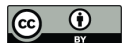

## *Supplement of*

# **Rock glaciers in Daxue Shan, south-eastern Tibetan Plateau: an inventory, their distribution, and their environmental controls**

**Zeze Ran and Gengnian Liu**

*Correspondence to:* Zeze Ran (ranzeze@pku.edu.cn)

- tc-12-2327-2018-supplement-title-page.pdf
- Supplementary data
  - Supplementary data A\_\_\_Google maps of the Daxue Shan rock glaciers.kmz
  - Supplementary data B\_\_\_Daxue Shan rock glaciers parameters.xlsx

The copyright of individual parts of the supplement might differ from the CC BY 4.0 License.
