# Supplementary material for: Rock glaciers in Daxue Shan, south-eastern Tibetan Plateau: an inventory, their distribution, and their environmental controls
Source: Copernicus journal article supplement (doi:10.5194/tc-12-2327-2018), 2018-07-16
Supplement: Supplementary file 2 [file tc-12-2327-2018-supplement.zip]

Archive with 4 entries (3 files):
- Supplementary data/
- Supplementary data/Supplementary data B___Daxue Shan rock glaciers parameters.xlsx
- Supplementary data/Supplementary data A___Google maps of the Daxue Shan rock glaciers.kmz
- tc-12-2327-2018-supplement-title-page.pdf
