# Supplementary material for: Rock glaciers in Daxue Shan, south-eastern Tibetan Plateau: an inventory, their distribution, and their environmental controls
Source: Copernicus journal article supplement (doi:10.5194/tc-12-2327-2018), 2018-07-16
Supplement: Supplementary file 2 [file tc-12-2327-2018-supplement.zip › Supplementary data/Supplementary data B___Daxue Shan rock glaciers parameters.xlsx]

## Sheet: Sheet1
Number	Rock glaciers location and topography parameters									Category
	Latitude(°)	Longitude(°)	Altitude(m)	Length (m)	Width (m)	Area(m2)	MAF(m)	Slope(°)	Aspect
DXSRG-001	30.0406	101.912	4118	803	152.607	122543	4018	27	43	talus-type	tongue-shaped
DXSRG-002	30.0369	101.903	4292	411	121.238	49828.8	4242	25	51	moraine-type	tongue-shaped
DXSRG-003	30.0373	101.901	4324	170	92.6902	15757.3	4307	26	54	moraine-type	tongue-shaped
DXSRG-004	30.0434	101.893	4428	407	167.328	68102.5	4391	19	42	moraine-type	tongue-shaped
DXSRG-005	30.0436	101.9	4312	686	175.803	120601	4226	20	70	moraine-type	tongue-shaped
DXSRG-006	30.0463	101.887	4480	324	146.93	47605.3	4439	31	96	talus-type	tongue-shaped
DXSRG-007	30.0486	101.885	4531	308	122.068	37596.9	4481	33	110	talus-type	tongue-shaped
DXSRG-008	30.0589	101.902	4174	818	223.449	182782	4057	27	47	talus-type	tongue-shaped
DXSRG-009	30.053	101.892	4393	320	246.963	79028.2	4368	28	343	moraine-type	tongue-shaped
DXSRG-010	30.0619	101.883	4507	462	154.855	71542.8	4470	17	115	talus-type	tongue-shaped
DXSRG-011	30.0663	101.894	4251	332	150.7	50032.5	4198	35	24	talus-type	tongue-shaped
DXSRG-012	30.0647	101.889	4373	442	88.8341	39264.7	4267	40	55	moraine-type	tongue-shaped
DXSRG-013	30.0855	101.889	4164	442	167.482	74027	4050	50	25	moraine-type	tongue-shaped
DXSRG-014	30.1028	101.895	4087	1151	287.817	331277	3935	31	70	talus-type	tongue-shaped
DXSRG-015	30.1026	101.885	4185	536	389.427	208733	4113	28	316	talus-type	tongue-shaped
DXSRG-016	30.0987	101.823	4681	617	132.219	81578.8	4621	20	300	moraine-type	tongue-shaped
DXSRG-017	30.1096	101.816	4548	1368	372.626	509752	4411	22	40	moraine-type	tongue-shaped
DXSRG-018	30.1124	101.81	4560	1046	221.293	231472	4404	17	43	moraine-type	tongue-shaped
DXSRG-019	30.1143	101.807	4558	1253	216.976	271872	4386	23	60	moraine-type	tongue-shaped
DXSRG-020	30.1182	101.804	4627	1287	344.617	443522	4424	22	90	moraine-type	tongue-shaped
DXSRG-021	30.1277	101.811	4315	409	1415.62	578990	4286	26	100	talus-type	lobate-shaped
DXSRG-022	30.1219	101.796	4644	544	202.116	109951	4531	36	23	moraine-type	tongue-shaped
DXSRG-023	30.1457	101.778	4552	838	331.402	277715	4383	30	62	moraine-type	tongue-shaped
DXSRG-024	30.1483	101.775	4602	567	185.1	104952	4496	34	82	moraine-type	tongue-shaped
DXSRG-025	30.1678	101.752	4550	1054	269.108	283640	4459	22	270	moraine-type	tongue-shaped
DXSRG-026	30.1403	101.764	4558	984	156.443	153940	4380	34	230	talus-type	tongue-shaped
DXSRG-027	30.1415	101.769	4673	798	219.635	175269	4556	27	200	talus-type	tongue-shaped
DXSRG-028	30.1245	101.773	4550	1341	279.714	375097	4367	28	224	moraine-type	tongue-shaped
DXSRG-029	30.1228	101.776	4557	1044	171.398	178940	4389	37	228	moraine-type	tongue-shaped
DXSRG-030	30.1154	101.784	4613	1052	516.316	543165	4485	26	235	moraine-type	tongue-shaped
DXSRG-031	30.1115	101.787	4594	1500	286.212	429317	4425	23	224	moraine-type	tongue-shaped
DXSRG-032	30.1093	101.792	4668	1711	195.1	333817	4462	23	213	talus-type	tongue-shaped
DXSRG-033	30.1078	101.797	4601	1258	264.717	333014	4486	21	193	moraine-type	tongue-shaped
DXSRG-034	30.1055	101.8	4612	754	245.467	185082	4537	23	211	talus-type	tongue-shaped
DXSRG-035	30.1011	101.805	4621	1184	197.969	234396	4516	19	228	talus-type	tongue-shaped
DXSRG-036	30.0984	101.806	4585	1302	310.164	403833	4453	22	216	moraine-type	tongue-shaped
DXSRG-037	30.0924	101.812	4525	1894	338.035	640238	4365	18	204	moraine-type	tongue-shaped
DXSRG-038	30.0913	101.822	4591	954	302.114	288217	4426	26	220	moraine-type	tongue-shaped
DXSRG-039	30.0897	101.825	4549	940	243.962	229324	4468	17	224	moraine-type	tongue-shaped
DXSRG-040	30.0896	101.831	4568	178	468.251	83348.6	4554	43	172	talus-type	lobate-shaped
DXSRG-041	30.08	101.826	4443	847	195.624	165693	4342	24	256	moraine-type	tongue-shaped
DXSRG-042	30.0674	101.819	4239	452	293.438	132634	4182	29	243	talus-type	tongue-shaped
DXSRG-043	30.0739	101.83	4425	536	138.721	74354.4	4368	23	127	talus-type	tongue-shaped
DXSRG-044	30.0782	101.833	4473	811	223.368	181151	4407	16	198	talus-type	tongue-shaped
DXSRG-045	30.0842	101.837	4601	446	147.925	65974.3	4520	37	200	moraine-type	tongue-shaped
DXSRG-046	30.0814	101.84	4527	993	229.799	228191	4470	15	195	moraine-type	tongue-shaped
DXSRG-047	30.0764	101.844	4539	1251	143.982	180122	4435	16	241	moraine-type	tongue-shaped
DXSRG-048	30.0766	101.85	4626	546	186.906	102051	4546	28	232	moraine-type	tongue-shaped
DXSRG-049	30.0714	101.852	4538	820	222.9	182778	4456	16	189	moraine-type	tongue-shaped
DXSRG-050	30.0665	101.838	4388	928	318.449	295521	4284	17	245	moraine-type	tongue-shaped
DXSRG-051	30.0628	101.833	4299	627	257.842	161667	4243	27	305	talus-type	tongue-shaped
DXSRG-052	30.0535	101.853	4347	401	306.226	122797	4275	40	352	talus-type	tongue-shaped
DXSRG-053	30.0594	101.878	4543	585	137.865	80650.9	4494	18	208	talus-type	tongue-shaped
DXSRG-054	30.0496	101.876	4426	972	293.812	285585	4318	26	305	moraine-type	tongue-shaped
DXSRG-055	30.0428	101.866	4108	1562	416.234	650157	3915	25	227	talus-type	tongue-shaped
DXSRG-056	30.0383	101.878	4364	1887	259.218	489145	4093	24	224	talus-type	tongue-shaped
DXSRG-057	30.0333	101.893	4357	723	158.19	114372	4285	22	206	moraine-type	tongue-shaped
DXSRG-058	30.0245	101.899	4191	605	96.6572	58477.6	4117	22	246	talus-type	tongue-shaped
DXSRG-059	30.0286	101.908	4248	255	323.147	82402.5	4234	22	42	talus-type	lobate-shaped
DXSRG-060	30.1414	101.878	4323	461	241.909	111520	4245	32	235	talus-type	tongue-shaped
DXSRG-061	30.1332	101.883	4302	550	143.684	79026.4	4151	46	214	talus-type	tongue-shaped
DXSRG-062	30.1748	101.844	4343	1177	265.304	312263	4167	30	201	talus-type	tongue-shaped
DXSRG-063	30.1786	101.841	4421	908	165.148	149955	4297	27	219	talus-type	tongue-shaped
DXSRG-064	30.2393	101.803	4484	840	127.925	107457	4380	16	7	moraine-type	tongue-shaped
DXSRG-065	30.191	101.832	4601	379	159.391	60409.4	4539	36	221	moraine-type	tongue-shaped
DXSRG-066	30.1912	101.796	4480	428	128.916	55176.2	4399	39	186	moraine-type	tongue-shaped
DXSRG-067	30.1911	101.793	4406	1039	213.188	221502	4258	31	203	moraine-type	tongue-shaped
DXSRG-068	30.187	101.794	4340	196	268.79	52682.8	4302	40	208	talus-type	lobate-shaped
DXSRG-069	30.2011	101.794	4637	235	232.552	54649.6	4604	30	266	moraine-type	tongue-shaped
DXSRG-070	30.2097	101.786	4589	323	727.545	234997	4562	16	298	moraine-type	lobate-shaped
DXSRG-071	30.2064	101.779	4507	223	92.0849	20534.9	4488	20	290	moraine-type	tongue-shaped
DXSRG-072	30.2175	101.777	4489	565	106.646	60255.1	4405	17	288	talus-type	tongue-shaped
DXSRG-073	30.2276	101.775	4328	301	106.909	32179.7	4301	21	280	talus-type	tongue-shaped
DXSRG-074	30.2279	101.783	4407	2004	250.149	501299	4195	15	355	talus-type	tongue-shaped
DXSRG-075	30.2177	101.791	4556	339	505.793	171464	4515	23	328	moraine-type	lobate-shaped
DXSRG-076	30.2216	101.794	4498	626	331.316	207404	4440	21	320	talus-type	tongue-shaped
DXSRG-077	30.2313	101.789	4338	1929	221.783	427820	4195	16	328	talus-type	tongue-shaped
DXSRG-078	30.235	101.791	4350	2005	223.34	447796	4170	17	330	moraine-type	tongue-shaped
DXSRG-079	30.2378	101.796	4378	893	123.895	110638	4278	23	310	talus-type	tongue-shaped
DXSRG-080	30.2415	101.792	4270	347	105.013	36439.6	4180	44	305	talus-type	tongue-shaped
DXSRG-081	30.2462	101.803	4246	928	248.179	230310	4090	30	317	talus-type	tongue-shaped
DXSRG-082	30.2521	101.805	4078	551	132.657	73093.9	3950	49	318	talus-type	tongue-shaped
DXSRG-083	30.2482	101.794	4294	920	413.885	380775	4063	22	340	moraine-type	tongue-shaped
DXSRG-084	30.2255	101.802	4448	715	134.583	96226.5	4347	22	73	moraine-type	tongue-shaped
DXSRG-085	30.2196	101.803	4475	707	135.724	95957.1	4273	37	105	talus-type	tongue-shaped
DXSRG-086	30.2118	101.795	4537	1583	350.825	555356	4403	17	43	moraine-type	tongue-shaped
DXSRG-087	30.1779	101.853	4298	630	101.004	63632.6	4177	35	81	talus-type	tongue-shaped
DXSRG-088	30.19	101.851	4318	382	502.398	191916	4232	45	8	talus-type	lobate-shaped
DXSRG-089	30.1961	101.858	4060	981	110.961	108853	3887	26	56	talus-type	tongue-shaped
DXSRG-090	30.1941	101.845	4388	401	194.551	78015.1	4345	27	110	talus-type	tongue-shaped
DXSRG-091	30.1978	101.839	4601	622	139.545	86796.9	4533	23	45	moraine-type	tongue-shaped
DXSRG-092	30.2056	101.838	4577	1359	364.379	495190	4427	20	124	talus-type	tongue-shaped
DXSRG-093	30.208	101.847	4378	934	172.431	161051	4203	33	113	talus-type	tongue-shaped
DXSRG-094	30.2112	101.853	4294	441	114.151	50340.4	4197	43	160	talus-type	tongue-shaped
DXSRG-095	30.2133	101.861	4280	793	140.365	111309	4113	35	143	talus-type	tongue-shaped
DXSRG-096	30.2158	101.872	4176	482	376.091	181276	4020	53	38	moraine-type	tongue-shaped
DXSRG-097	30.2241	101.861	4184	1160	171.34	198754	4008	39	341	moraine-type	tongue-shaped
DXSRG-098	30.2196	101.859	4309	752	234.196	176115	4202	28	321	talus-type	tongue-shaped
DXSRG-099	30.2173	101.856	4430	416	102.171	42503	4367	33	51	talus-type	tongue-shaped
DXSRG-100	30.2185	101.851	4383	1423	145.527	207084	4181	25	37	moraine-type	tongue-shaped
DXSRG-101	30.216	101.841	4565	1382	460.578	636519	4419	16	30	moraine-type	tongue-shaped
DXSRG-102	30.2289	101.849	4351	1043	154.639	161289	4190	20	33	moraine-type	tongue-shaped
DXSRG-103	30.2319	101.842	4480	300	544.652	163396	4415	44	86	moraine-type	lobate-shaped
DXSRG-104	30.2281	101.841	4529	642	114.952	73799.4	4424	32	111	talus-type	tongue-shaped
DXSRG-105	30.2372	101.845	4356	360	100.041	36014.7	4269	44	86	moraine-type	tongue-shaped
DXSRG-106	30.2391	101.837	4509	274	115.247	31577.6	4469	32	85	talus-type	tongue-shaped
DXSRG-107	30.2275	101.831	4592	670	275.118	184329	4518	24	33	moraine-type	tongue-shaped
DXSRG-108	30.2327	101.825	4382	541	497.785	269302	4306	27	358	moraine-type	tongue-shaped
DXSRG-109	30.2334	101.828	4404	3125	202.725	633516	3948	26	324	moraine-type	tongue-shaped
DXSRG-110	30.2249	101.819	4463	864	214.811	185597	4292	42	258	talus-type	tongue-shaped
DXSRG-111	30.2211	101.82	4492	1151	250.55	288383	4303	31	271	talus-type	tongue-shaped
DXSRG-112	30.2158	101.821	4464	1582	639.533	1.01174e+06	4201	25	280	talus-type	tongue-shaped
DXSRG-113	30.2071	101.827	4675	885	300.565	266000	4568	17	310	moraine-type	tongue-shaped
DXSRG-114	30.2077	101.822	4570	806	145.477	117255	4476	25	325	moraine-type	tongue-shaped
DXSRG-115	30.2043	101.82	4571	1951	226.573	442044	4359	19	290	talus-type	tongue-shaped
DXSRG-116	30.1881	101.841	4548	437	315.721	137970	4492	29	42	moraine-type	tongue-shaped
DXSRG-117	30.1922	101.835	4650	186	83.9711	15618.6	4619	32	101	moraine-type	tongue-shaped
DXSRG-118	30.2581	101.767	4278	342	136.541	46697.1	4177	48	63	talus-type	tongue-shaped
DXSRG-119	30.2647	101.767	4129	531	160.443	85195.4	3970	50	39	talus-type	tongue-shaped
DXSRG-120	30.2691	101.759	4306	824	92.2032	75975.5	4142	29	39	talus-type	tongue-shaped
DXSRG-121	30.271	101.753	4224	564	258.819	145974	4161	29	331	talus-type	tongue-shaped
DXSRG-122	30.266	101.752	4366	316	96.6061	30527.5	4298	39	305	talus-type	tongue-shaped
DXSRG-123	30.2615	101.75	4483	467	232.982	108803	4402	32	337	talus-type	tongue-shaped
DXSRG-124	30.2564	101.742	4601	96	763.324	73279.1	4576	36	7	talus-type	lobate-shaped
DXSRG-125	30.2543	101.737	4559	826	149.029	123098	4467	20	280	talus-type	tongue-shaped
DXSRG-126	30.2656	101.705	4446	251	370.372	92963.4	4413	28	267	talus-type	lobate-shaped
DXSRG-127	30.2782	101.706	4529	377	157.66	59437.9	4458	39	296	talus-type	tongue-shaped
DXSRG-128	30.2898	101.717	4667	404	215.027	86870.7	4604	30	281	talus-type	tongue-shaped
DXSRG-129	30.2869	101.684	4504	140	168.516	23592.2	4477	29	291	talus-type	lobate-shaped
DXSRG-130	30.2885	101.686	4554	231	88.027	20334.2	4531	22	263	talus-type	tongue-shaped
DXSRG-131	30.3056	101.692	4924	860	207.79	178700	4733	35	228	talus-type	tongue-shaped
DXSRG-132	30.3179	101.684	4886	646	108.27	69942.7	4812	20	230	talus-type	tongue-shaped
DXSRG-133	30.319	101.672	4691	1191	205.46	244703	4540	26	253	talus-type	tongue-shaped
DXSRG-134	30.317	101.676	4709	1288	171.817	221300	4559	26	238	talus-type	tongue-shaped
DXSRG-135	30.3222	101.672	4689	381	178.784	68116.6	4609	46	274	talus-type	tongue-shaped
DXSRG-136	30.3247	101.675	4769	657	208.612	137058	4682	19	273	talus-type	tongue-shaped
DXSRG-137	30.3337	101.669	4670	408	121.727	49664.8	4613	35	244	talus-type	tongue-shaped
DXSRG-138	30.3481	101.66	4645	396	69.3807	27474.8	4590	32	237	talus-type	tongue-shaped
DXSRG-139	30.3604	101.651	4655	1013	115.707	117212	4531	32	247	talus-type	tongue-shaped
DXSRG-140	30.3555	101.644	4482	444	88.45	39271.8	4429	24	245	talus-type	tongue-shaped
DXSRG-141	30.3744	101.647	4502	676	216.998	146691	4435	25	316	talus-type	tongue-shaped
DXSRG-142	30.3775	101.649	4440	386	129.327	49920.3	4407	21	310	talus-type	tongue-shaped
DXSRG-143	30.3679	101.655	4596	441	227.393	100280	4532	37	10	moraine-type	tongue-shaped
DXSRG-144	30.3743	101.664	4564	628	182.734	114757	4446	35	84	talus-type	tongue-shaped
DXSRG-145	30.3641	101.659	4804	304	94.6701	28779.7	4749	35	28	moraine-type	tongue-shaped
DXSRG-146	30.3618	101.664	4651	814	137.694	112083	4544	26	57	moraine-type	tongue-shaped
DXSRG-147	30.351	101.671	4649	196	407.579	79885.6	4601	46	22	moraine-type	lobate-shaped
DXSRG-148	30.3411	101.673	4735	492	250.176	123086	4669	26	15	moraine-type	tongue-shaped
DXSRG-149	30.333	101.678	4701	736	185.484	136516	4559	36	38	moraine-type	tongue-shaped
DXSRG-150	30.342	101.692	4792	1300	330.892	430160	4629	18	215	talus-type	tongue-shaped
DXSRG-151	30.3416	101.683	4533	536	95.2386	51047.9	4432	37	284	talus-type	tongue-shaped
DXSRG-152	30.3199	101.705	4757	861	470.599	405186	4646	25	138	moraine-type	tongue-shaped
DXSRG-153	30.3085	101.714	4533	550	223.296	122813	4442	40	53	moraine-type	tongue-shaped
DXSRG-154	30.2777	101.728	4552	352	336.754	118537	4486	40	54	moraine-type	tongue-shaped
DXSRG-155	30.2788	101.745	4479	998	169.651	169311	4347	14	44	talus-type	tongue-shaped
DXSRG-156	30.2725	101.79	4359	1026	259.433	266178	4183	31	230	talus-type	tongue-shaped
DXSRG-157	30.2771	101.787	4342	1284	220.764	283461	4177	26	226	talus-type	tongue-shaped
DXSRG-158	30.2877	101.768	4380	1239	178.16	220740	4152	31	241	talus-type	tongue-shaped
DXSRG-159	30.2933	101.764	4366	1291	260.043	335716	4125	31	246	talus-type	tongue-shaped
DXSRG-160	30.2975	101.747	4259	1168	133.055	155408	3998	41	191	talus-type	tongue-shaped
DXSRG-161	30.3032	101.74	4420	547	155.744	85192.1	4241	49	210	talus-type	tongue-shaped
DXSRG-162	30.3104	101.722	4369	373	1077.03	401734	4307	34	207	talus-type	lobate-shaped
DXSRG-163	30.2781	101.805	4224	1907	209.819	400125	3910	28	60	talus-type	tongue-shaped
DXSRG-164	30.2863	101.8	4293	1968	183.706	361533	4011	24	76	talus-type	tongue-shaped
DXSRG-165	30.2973	101.809	4092	1271	379.243	482018	3930	30	70	talus-type	tongue-shaped
DXSRG-166	30.2987	101.8	4151	1858	271.495	504438	3831	30	356	talus-type	tongue-shaped
DXSRG-167	30.2872	101.791	4498	294	192.383	56560.5	4471	21	16	talus-type	tongue-shaped
DXSRG-168	30.2866	101.781	4554	495	437.667	216645	4506	19	10	moraine-type	tongue-shaped
DXSRG-169	30.2936	101.778	4444	826	205.535	169772	4356	21	359	talus-type	tongue-shaped
DXSRG-170	30.2927	101.774	4552	479	204.563	97985.7	4506	23	348	moraine-type	tongue-shaped
DXSRG-171	30.3187	101.79	4125	1826	233.162	425753	3850	32	4	talus-type	tongue-shaped
DXSRG-172	30.3272	101.778	4119	504	86.1055	43397.2	3887	66	322	talus-type	tongue-shaped
DXSRG-173	30.3245	101.775	4208	734	303.706	222920	4048	39	334	talus-type	tongue-shaped
DXSRG-174	30.3	101.765	4514	148	535.765	79293.1	4479	59	332	moraine-type	lobate-shaped
DXSRG-175	30.3159	101.735	4421	203	102.166	20739.7	4383	35	5	moraine-type	tongue-shaped
DXSRG-176	30.3126	101.73	4505	481	293.418	141134	4438	29	347	moraine-type	tongue-shaped
DXSRG-177	30.3274	101.718	4425	1463	201.996	295520	4073	41	51	moraine-type	tongue-shaped
DXSRG-178	30.332	101.709	4569	1800	256.137	461047	4274	30	52	moraine-type	tongue-shaped
DXSRG-179	30.3402	101.706	4642	1177	218.805	257534	4366	30	50	moraine-type	tongue-shaped
DXSRG-180	30.3482	101.706	4565	898	325.294	292114	4417	29	58	moraine-type	tongue-shaped
DXSRG-181	30.3568	101.696	4739	449	840.949	377586	4667	33	37	moraine-type	lobate-shaped
DXSRG-182	30.3632	101.691	4594	784	225.428	176736	4503	23	352	talus-type	tongue-shaped
DXSRG-183	30.3646	101.696	4802	974	258.159	251447	4584	31	225	talus-type	tongue-shaped
DXSRG-184	30.3606	101.702	4800	1668	356.343	594379	4613	27	260	talus-type	tongue-shaped
DXSRG-185	30.3537	101.705	4580	546	313.158	170984	4504	30	163	talus-type	tongue-shaped
DXSRG-186	30.3466	101.718	4406	1226	440.531	540091	4284	28	244	talus-type	tongue-shaped
DXSRG-187	30.3441	101.727	4512	861	343.352	295626	4399	30	188	talus-type	tongue-shaped
DXSRG-188	30.3466	101.735	4735	1197	644.905	771952	4509	34	175	talus-type	tongue-shaped
DXSRG-189	30.3414	101.745	4633	546	362.616	197988	4467	50	231	talus-type	tongue-shaped
DXSRG-190	30.3572	101.744	4748	1220	284.316	346866	4556	25	78	moraine-type	tongue-shaped
DXSRG-191	30.3655	101.74	4739	1196	502.105	600518	4516	34	21	moraine-type	tongue-shaped
DXSRG-192	30.3529	101.725	4778	970	188.57	182913	4593	42	270	talus-type	tongue-shaped
DXSRG-193	30.3615	101.727	4693	1446	313.974	454006	4484	28	307	moraine-type	tongue-shaped
DXSRG-194	30.365	101.729	4629	856	214.803	183871	4470	41	286	talus-type	tongue-shaped
DXSRG-195	30.3689	101.73	4608	910	252.291	229585	4477	39	282	talus-type	tongue-shaped
DXSRG-196	30.3735	101.73	4507	598	216.956	129740	4417	36	288	talus-type	tongue-shaped
DXSRG-197	30.3814	101.731	4378	531	391.053	207649	4298	32	306	talus-type	tongue-shaped
DXSRG-198	30.3594	101.716	4791	893	286.185	255563	4587	41	103	moraine-type	tongue-shaped
DXSRG-199	30.4289	101.662	4349	519	87.3641	45342	4194	48	45	talus-type	tongue-shaped
DXSRG-200	30.431	101.658	4422	1064	236.033	251140	4307	27	57	moraine-type	tongue-shaped
DXSRG-201	30.437	101.657	4289	1398	256.612	358743	4100	24	53	moraine-type	tongue-shaped
DXSRG-202	30.437	101.646	4315	1552	377.025	585143	4065	27	352	moraine-type	tongue-shaped
DXSRG-203	30.4326	101.641	4380	2013	238.935	480976	4195	17	337	talus-type	tongue-shaped
DXSRG-204	30.4208	101.641	4551	561	259.113	145362	4491	22	348	moraine-type	tongue-shaped
DXSRG-205	30.4253	101.657	4409	470	104.857	49282.7	4180	64	136	talus-type	tongue-shaped
DXSRG-206	30.425	101.651	4551	750	162.877	122157	4474	25	190	talus-type	tongue-shaped
DXSRG-207	30.4204	101.648	4472	581	248.762	144531	4411	23	270	moraine-type	tongue-shaped
DXSRG-208	30.4115	101.635	4520	1191	152.688	181851	4370	24	126	talus-type	tongue-shaped
DXSRG-209	30.3888	101.64	4359	1573	145.81	229359	4213	21	34	talus-type	tongue-shaped
DXSRG-210	30.3907	101.637	4483	672	294.921	198187	4428	15	17	talus-type	tongue-shaped
DXSRG-211	30.4189	101.613	4502	809	200.449	162163	4394	25	293	moraine-type	tongue-shaped
DXSRG-212	30.4596	101.643	4341	1028	254.047	261161	4209	28	14	moraine-type	tongue-shaped
DXSRG-213	30.4602	101.638	4315	1561	278.097	434110	4111	24	12	moraine-type	tongue-shaped
DXSRG-214	30.4582	101.628	4426	1454	148.306	215637	4207	19	340	moraine-type	tongue-shaped
DXSRG-215	30.4609	101.631	4399	772	187.428	144694	4301	22	334	talus-type	tongue-shaped
DXSRG-216	30.4472	101.628	4539	156	211.19	32945.7	4503	52	294	talus-type	tongue-shaped
DXSRG-217	30.4526	101.625	4421	1247	187.795	234180	4232	24	300	talus-type	tongue-shaped
DXSRG-218	30.4476	101.636	4422	1011	187.008	189065	4289	26	90	moraine-type	tongue-shaped
DXSRG-219	30.4521	101.638	4509	485	97.5418	47307.8	4476	16	112	talus-type	tongue-shaped
DXSRG-220	30.4433	101.633	4394	889	158.851	141218	4212	37	108	moraine-type	tongue-shaped
DXSRG-221	30.4397	101.631	4514	749	173.133	129677	4411	26	85	talus-type	tongue-shaped
DXSRG-222	30.4372	101.628	4485	942	167.736	158008	4354	25	93	talus-type	tongue-shaped
DXSRG-223	30.4484	101.621	4486	937	128.34	120255	4315	25	325	moraine-type	tongue-shaped
DXSRG-224	30.4652	101.611	4373	936	275.044	257442	4168	37	67	moraine-type	tongue-shaped
DXSRG-225	30.4848	101.624	4374	863	271.666	234447	4260	17	11	moraine-type	tongue-shaped
DXSRG-226	30.4843	101.62	4364	1075	173.624	186646	4250	20	8	moraine-type	tongue-shaped
DXSRG-227	30.4744	101.61	4423	908	234.339	212780	4343	16	336	moraine-type	tongue-shaped
DXSRG-228	30.4839	101.597	4410	790	284.452	224717	4334	18	46	moraine-type	tongue-shaped
DXSRG-229	30.5066	101.612	4251	1336	171.255	228797	3989	24	17	moraine-type	tongue-shaped
DXSRG-230	30.5051	101.607	4343	840	103.924	87296	4250	21	32	talus-type	tongue-shaped
DXSRG-231	30.5078	101.601	4224	1564	119.431	186791	4002	26	348	talus-type	tongue-shaped
DXSRG-232	30.5062	101.594	4296	934	149.731	139849	4174	14	28	talus-type	tongue-shaped
DXSRG-233	30.508	101.591	4313	786	166.906	131188	4243	14	35	talus-type	tongue-shaped
DXSRG-234	30.5243	101.584	4235	908	157.115	142661	4068	31	56	talus-type	tongue-shaped
DXSRG-235	30.0373	101.907	4246	382	109.29	41749	4194	29	36	moraine-type	tongue-shaped
DXSRG-236	30.224	101.776	4349	856	345.532	295776	4168	33	291	moraine-type	tongue-shaped
DXSRG-237	30.2488	101.738	4545	550	88.8189	48850.4	4489	24	290	moraine-type	tongue-shaped
DXSRG-238	30.2475	101.737	4496	403	112.373	45286.4	4456	23	292	moraine-type	tongue-shaped
DXSRG-239	30.2452	101.74	4536	479	129.141	61858.5	4462	29	228	moraine-type	tongue-shaped
DXSRG-240	30.2375	101.757	4348	487	227.982	111027	4276	30	33	moraine-type	tongue-shaped
DXSRG-241	30.237	101.761	4310	437	87.7869	38362.9	4229	37	65	moraine-type	tongue-shaped
DXSRG-242	30.2527	101.746	4545	752	162.88	122486	4491	20	62	moraine-type	tongue-shaped
DXSRG-243	30.2552	101.754	4438	1056	246.632	260443	4324	24	101	talus-type	tongue-shaped
DXSRG-244	30.2869	101.716	4619	491	128.936	63307.7	4547	37	286	moraine-type	tongue-shaped
DXSRG-245	30.3678	101.653	4633	315	142.041	44742.9	4567	38	28	moraine-type	tongue-shaped
DXSRG-246	30.3483	101.666	4833	300	83.6253	25087.6	4793	22	342	moraine-type	tongue-shaped
DXSRG-247	30.3345	101.676	4749	448	146.888	65806	4657	39	86	moraine-type	tongue-shaped
DXSRG-248	30.4237	101.612	4540	556	105.051	58408.1	4475	24	270	moraine-type	tongue-shaped
DXSRG-249	30.4748	101.605	4322	255	247.871	63207	4256	47	332	talus-type	tongue-shaped
DXSRG-250	30.4643	101.6	4457	353	305.25	107753	4418	27	343	moraine-type	tongue-shaped
DXSRG-251	30.0742	101.823	4424	766	137.305	105175	4305	21	295	talus-type	tongue-shaped
DXSRG-252	30.0722	101.822	4387	530	189.129	100238	4293	28	276	talus-type	tongue-shaped
DXSRG-253	30.0538	101.861	4432	360	181.343	65283.5	4376	30	311	moraine-type	tongue-shaped
DXSRG-254	30.0599	101.856	4367	412	119.309	49155.3	4307	30	290	moraine-type	tongue-shaped
DXSRG-255	30.0601	101.86	4445	455	116.907	53192.8	4400	24	296	moraine-type	tongue-shaped
DXSRG-256	30.062	101.865	4525	311	134.557	41847.2	4499	23	304	moraine-type	tongue-shaped
DXSRG-257	30.0565	101.831	4201	920	183.833	169126	4049	33	259	talus-type	tongue-shaped
DXSRG-258	30.227	101.756	4326	384	103.22	39636.4	4220	46	72	moraine-type	tongue-shaped
DXSRG-259	30.2993	101.7	4664	1864	199.976	372756	4344	28	188	moraine-type	tongue-shaped
DXSRG-260	30.5204	101.577	4357	842	101.709	85638.8	4243	21	305	talus-type	tongue-shaped
DXSRG-261	30.0551	101.898	4337	443	109.453	48487.7	4293	22	329	moraine-type	tongue-shaped
DXSRG-262	30.1973	101.795	4570	274	194.609	53323	4540	43	260	moraine-type	tongue-shaped
DXSRG-263	30.219	101.776	4464	228	86.7234	19772.9	4427	32	276	moraine-type	tongue-shaped
DXSRG-264	30.2217	101.836	4643	926	213.514	197714	4505	24	28	moraine-type	tongue-shaped
DXSRG-265	30.2333	101.852	4190	465	185.769	86382.8	4120	34	358	talus-type	tongue-shaped
DXSRG-266	30.2067	101.82	4577	507	109.99	55765.1	4510	23	316	moraine-type	tongue-shaped
DXSRG-267	30.1841	101.835	4482	793	174.617	138471	4386	25	215	moraine-type	tongue-shaped
DXSRG-268	30.2978	101.687	4609	870	206.052	179265	4494	35	252	talus-type	tongue-shaped
DXSRG-269	30.3315	101.668	4645	276	154.544	42654.1	4601	40	273	talus-type	tongue-shaped
DXSRG-270	30.2765	101.81	4120	1162	147.974	171945	3843	39	70	moraine-type	tongue-shaped
DXSRG-271	30.286	101.788	4537	293	149.594	43831.1	4486	31	13	moraine-type	tongue-shaped
DXSRG-272	30.3212	101.774	4252	594	125.389	74481.2	4148	34	346	talus-type	tongue-shaped
DXSRG-273	30.3241	101.719	4511	854	208.246	177842	4365	31	22	moraine-type	tongue-shaped
DXSRG-274	30.3518	101.702	4619	367	385.584	141509	4531	47	87	moraine-type	lobate-shaped
DXSRG-275	30.3692	101.695	4855	1252	154.199	193057	4524	37	262	talus-type	tongue-shaped
DXSRG-276	30.3524	101.711	4519	791	320.043	253154	4388	31	133	talus-type	tongue-shaped
DXSRG-277	30.3448	101.743	4738	534	166.132	88714.5	4643	34	233	talus-type	tongue-shaped
DXSRG-278	30.1251	101.791	4621	697	290.087	202190	4451	41	27	moraine-type	tongue-shaped
DXSRG-279	30.1279	101.789	4585	799	284.528	227338	4396	37	57	moraine-type	tongue-shaped
DXSRG-280	30.1315	101.785	4579	670	198.889	133255	4425	44	34	moraine-type	tongue-shaped
DXSRG-281	30.1359	101.784	4525	916	294.271	269552	4331	37	64	moraine-type	tongue-shaped
DXSRG-282	30.1399	101.782	4507	1117	229.448	256293	4319	31	76	moraine-type	tongue-shaped
DXSRG-283	30.1028	101.801	4597	1118	210.541	235385	4476	24	211	talus-type	tongue-shaped
DXSRG-284	30.077	101.824	4427	452	238.89	107978	4383	19	276	talus-type	tongue-shaped
DXSRG-285	30.1992	101.837	4607	510	183.176	93419.8	4543	30	69	moraine-type	tongue-shaped
DXSRG-286	30.2022	101.835	4665	604	198.168	119693	4598	22	111	moraine-type	tongue-shaped
DXSRG-287	30.3167	101.686	4862	645	247.221	159458	4787	22	225	talus-type	tongue-shaped
DXSRG-288	30.3096	101.687	4795	936	412.73	386315	4642	31	236	talus-type	tongue-shaped
DXSRG-289	30.2837	101.798	4369	991	210.509	208614	4227	28	41	moraine-type	tongue-shaped
DXSRG-290	30.2831	101.801	4298	701	164.395	115241	4166	38	29	moraine-type	tongue-shaped
DXSRG-291	30.2841	101.809	4116	1575	171.799	270584	3882	27	68	moraine-type	tongue-shaped
DXSRG-292	30.2912	101.793	4381	514	193.829	99627.9	4326	24	12	moraine-type	tongue-shaped
DXSRG-293	30.3113	101.787	4391	817	201.666	164761	4216	34	354	moraine-type	tongue-shaped
DXSRG-294	30.3008	101.761	4510	551	200.223	110323	4468	19	345	moraine-type	tongue-shaped
DXSRG-295	30.3038	101.755	4507	242	212.793	51495.9	4451	40	350	moraine-type	tongue-shaped
